# Supplementary material
Source: Springer Nature journal article supplement (https://www.springermedizin.de/resource/supplementary/12888_2006_167_MOESM3_ESM.pdf/9482056)

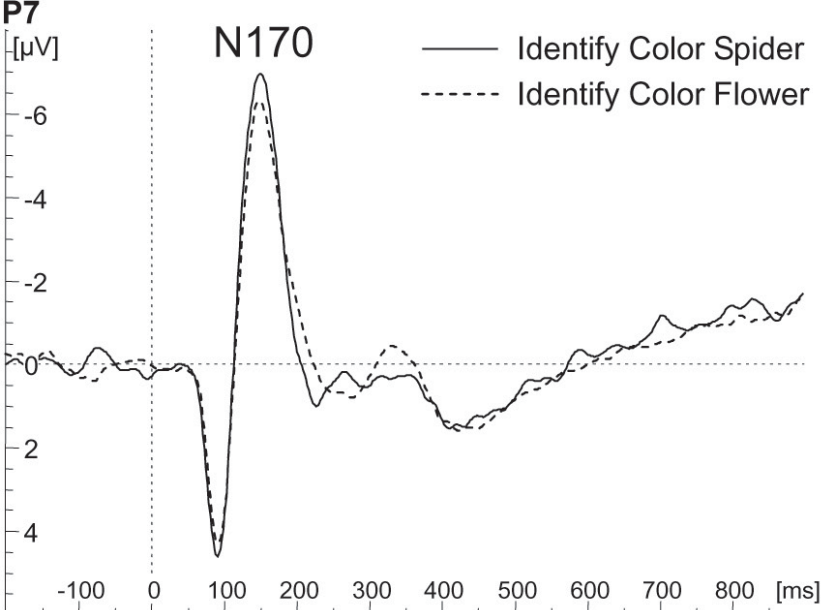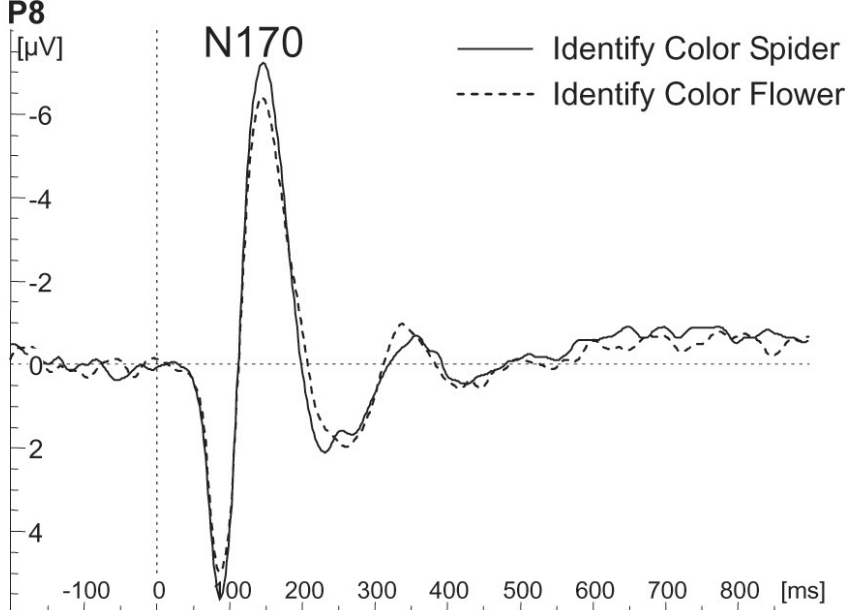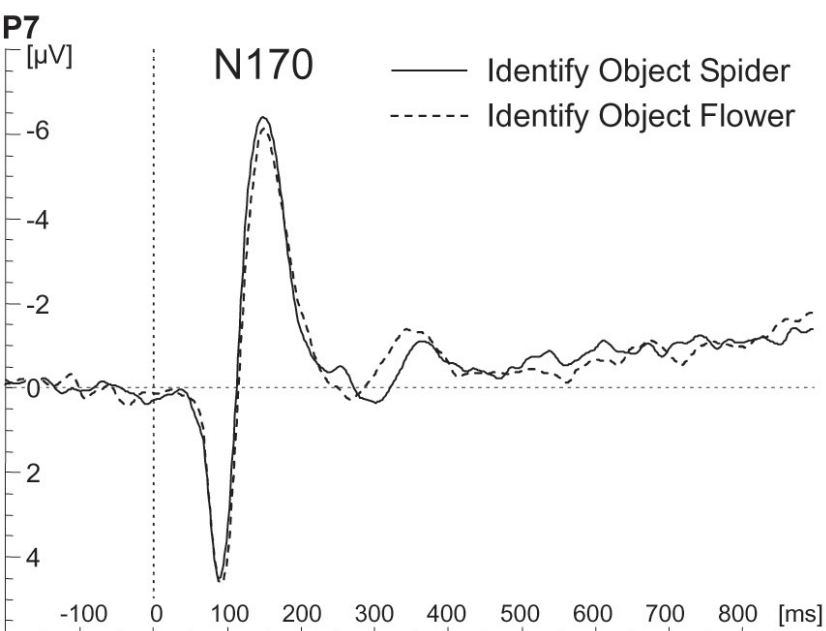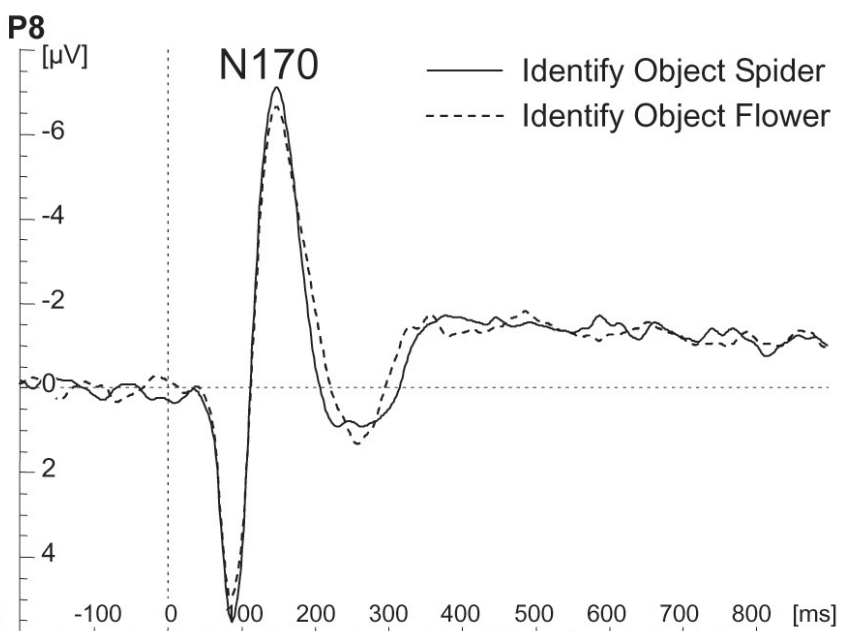

Supplement: MOESM3 [file 9482056]
